# Supplementary material for: Efficacy and target engagement of dopamine agonist pramipexole for anhedonic depression - the PRIME-PRAXOL randomized controlled trial
Source: Research Square preprint supplement (doi:10.21203/rs.3.rs-7887410/v1), 2025-10-29
Supplement: Supplementary file 2 [file a581079cd44e2a2ef150b5ce.docx]

**Supplementary Table 3.** Criteria for inclusion and exclusion of participants.

| **Inclusion criteria** | 1. Age ≥18 years ≤75 years. 2. Diagnosis of unipolar depressive episode or bipolar disorder in depressive phase or dysthymia 3. Clinically significant anhedonia symptoms: 3 or 4 points on ≥ 3 items of the SHAPS. 4. Ongoing treatment with at least one antidepressant or mood stabilizing medication ≥ 4 weeks. Has tried an antidepressant at a therapeutic dose but not achieved remission (refractory stage 1 depression). 5. The research subject has given informed consent to participate in the study. |
| --- | --- |
| **Exclusion criteria** | 1. Pregnancy, breastfeeding or planned pregnancy (if female). 2. High suicide risk according to the overall clinical assessment of the research physician. 3. Ongoing substance abuse (within 6 months). 4. Diagnosis of current psychotic disorder. 5. Known diagnosis of Emotionally Unstable Personality Disorder. 6. Ongoing treatment under the Compulsory Psychiatric Care Act. 7. Medical history or strong clinical suspicion of impulse control disorder (including current binge-eating disorder) or a current ADHD diagnosis with hyperactivity. 8. Diagnosis of intellectual disability, dementia, or other circumstances that makes it difficult to understand the meaning of participating in the trial and provide informed consent. 9. Diagnosis of renal failure (eGFR < 50 ml/min/1.73m2) or severe cardiovascular disease (specifically symptomatic heart failure NYHA Class II or greater). 10. Recently started psychotherapy (within 6 weeks) or planning to start such treatment during participation in the trial. 11. Ongoing ECT, ketamine or rTMS treatment, except maintenance ECT, ketamine or rTMS. (Maintenance treatment is defined as the use of ECT/ketamine/rTMS for a period exceeding 3 months after a series of ECT/ketamine/rTMS treatment in order to prevent the onset of a new episode). 12. Other medical conditions or other concomitant drug treatment which, in the opinion of the investigators, may affect the evaluability of the trial or conditions that increase trial risk. For example, Parkinson's disease, hepatic insufficiency, ongoing cancer not in remission for more than one year, obesity surgery affecting the absorption of extended-release tablets. 13. Ongoing treatment with drugs that affect plasma levels of pramipexole or have similar or antagonistic mechanism of action as pramipexole are not allowed. Ongoing treatment with neuroleptics is not allowed except for low-dose quetiapine (≤150 mg/day) since it has very low binding to dopamine receptors at such low doses. 14. Known or suspected allergy to any active substance or excipient in the medicinal product included in the trial. 15. Participation in other treatment studies. 16. Other reasons, as assessed by the investigator, that prevents the research subject's participation, such as the risk that the research subject is unable to complete the trial (non-compliance). |
