# Supplementary material for: Efficacy and target engagement of dopamine agonist pramipexole for anhedonic depression - the PRIME-PRAXOL randomized controlled trial
Source: Research Square preprint supplement (doi:10.21203/rs.3.rs-7887410/v1), 2025-10-29
Supplement: Supplementary file 3 [file a5f23699f7ceccf8df4f6e1f.docx]

**Supplementary Table 4. Dose titration schedule**

| Week | Step | Total dose  (mg base) | Total dose  (mg salt) |
| --- | --- | --- | --- |
| 1 | 1 | 0.26 | 0.375 |
| 2 | 2 | 0.52 | 0.75 |
| 3 | 3 | 1.05 | 1.5 |
| 4 | 4 | 1.57 | 2.25 |
| 5 | 5 | 2.1 | 3.0 |
| 6 | 6 | 2.62 | 3.75 |
| 7 | 7 | 3.15 | 4.5 |
| 8 |  | 3.15 | 4.5 |
| 9 |  | 3.15 | 4.5 |
