# Supplementary material for: Efficacy and target engagement of dopamine agonist pramipexole for anhedonic depression - the PRIME-PRAXOL randomized controlled trial
Source: Research Square preprint supplement (doi:10.21203/rs.3.rs-7887410/v1), 2025-10-29
Supplement: Supplementary file 4 [file b84ac8e9c27cc5f3004b5ab9.docx]

**Supplementary Table 2.** M-YMRS, M-PGSI, and M-QUIP. Prevalence (%) of items with scores >1. All scales were modified to a uniform Likert scale ranging from 0 to 3. P-values are based on chi-square tests. If patients self-reported any such symptoms, they were further evaluated by the study physician for clinical significance.

**Table S2A.** Prevalence of positive responses to M-YMRS items at each follow-up in the active treatment and placebo groups Values are presented as n/N (%). YMRS = Young Mania Rating Scale; responses are based on ratings from the past 3 days. “–” indicates no statistical test performed.

| **YMRS item** | **Week** | **Active treatment,**  **n/N (%)** | **Placebo,**  **n/N (%)** | **p-value** |
| --- | --- | --- | --- | --- |
| Elevated mood | 3 | 24/43 (55.81%) | 18/42 (42.86%) | 0.28 |
| Increased motor activity | 3 | 15/43 (34.88%) | 7/42 (16.67%) | 0.08 |
| Reduced sleep | 3 | 26/43 (60.46%) | 14/42 (33.34%) | **0.02** |
| Irritability | 3 | 20/43 (46.51%) | 16/42 (38.10%) | 0.51 |
| Speech (rate and amount) | 3 | 10/43 (23.26%) | 1/42 (2.38%) | **0.01** |
| Language–thought disorder | 3 | 13/43 (30.23%) | 6/42 (14.29%) | 0.12 |
| Appearance | 3 | 5/43 (11.63%) | 0/42 (0.00%) | 0.06 |
| Elevated mood | 6 | 24/43 (55.81%) | 16/42 (38.10%) | 0.13 |
| Increased motor activity | 6 | 20/43 (46.51%) | 5/42 (11.90%) | **0.00** |
| Reduced sleep | 6 | 26/43 (60.46%) | 17/42 (40.48%) | 0.12 |
| Irritability | 6 | 17/43 (39.53%) | 14/42 (33.34%) | 0.65 |
| Speech (rate and amount) | 6 | 9/43 (20.93%) | 6/42 (14.29%) | 0.57 |
| Language–thought disorder | 6 | 10/43 (23.26%) | 8/42 (19.05%) | 0.79 |
| Appearance | 6 | 7/43 (16.28%) | 4/42 (9.52%) | 0.52 |
| Elevated mood | 9 | 23/43 (53.49%) | 16/42 (38.10%) | 0.27 |
| Increased motor activity | 9 | 14/43 (32.59%) | 7/42 (16.67%) | 0.13 |
| Reduced sleep | 9 | 28/43 (65.12%) | 14/42 (33.34%) | **0.01** |
| Irritability | 9 | 7/43 (16.28%) | 12/42 (28.57%) | 0.19 |
| Speech (rate and amount) | 9 | 6/43 (13.95%) | 3/42 (7.14%) | 0.48 |
| Language–thought disorder | 9 | 10/43 (23.26%) | 6/42 (14.29%) | 0.41 |
| Appearance | 9 | 5/43 (11.63%) | 3/42 (7.14%) | 0.71 |

**Table S2B**. Prevalence of positive responses to PGSI items at each follow-up in the active treatment and placebo groups. Values are presented as n/N (%). PGSI = Problem Gambling Severity Index; responses are for the past 12 months. “–” indicates no statistical test performed due to zero counts.

| **PGSI item** | **Week** | **Active treatment,**  **n/N (%)** | **Placebo,**  **n/N (%)** | **p-value** |
| --- | --- | --- | --- | --- |
| Have you bet more than you could really afford to lose? | 3 | 0/42 (0.00%) | 0/41 (0.00%) | – |
| Have you needed to gamble with larger amounts of money to get the same feeling of excitement? | 3 | 0/42 (0.00%) | 0/41 (0.00%) | – |
| Have you felt that you might have a problem with gambling? | 3 | 0/42 (0.00%) | 0/41 (0.00%) | – |
| Have people criticized your betting or told you that you had a gambling problem, regardless of whether or not you thought it was true? | 3 | 0/42 (0.00%) | 0/41 (0.00%) | – |
| Have you felt guilty about the way you gamble or what happens when you gamble? | 3 | 0/42 (0.00%) | 0/41 (0.00%) | – |
| Have you bet more than you could really afford to lose? | 6 | 0/42 (0.00%) | 0/40 (0.00%) | – |
| Have you needed to gamble with larger amounts of money to get the same feeling of excitement? | 6 | 0/42 (0.00%) | 0/40 (0.00%) | – |
| Have you felt that you might have a problem with gambling? | 6 | 0/42 (0.00%) | 0/40 (0.00%) | – |
| Have people criticized your betting or told you that you had a gambling problem, regardless of whether or not you thought it was true? | 6 | 0/42 (0.00%) | 0/40 (0.00%) | – |
| Have you felt guilty about the way you gamble or what happens when you gamble? | 6 | 1/42 (2.38%) | 0/40 (0.00%) | 1.00 |
| Have you bet more than you could really afford to lose? | 9 | 0/42 (0.00%) | 1/39 (2.56%) | 0.48 |
| Have you needed to gamble with larger amounts of money to get the same feeling of excitement? | 9 | 0/42 (0.00%) | 1/39 (2.56%) | 0.48 |
| Have you felt that you might have a problem with gambling? | 9 | 0/42 (0.00%) | 0/39 (0.00%) | – |
| Have people criticized your betting or told you that you had a gambling problem, regardless of whether or not you thought it was true? | 9 | 0/42 (0.00%) | 0/39 (0.00%) | – |
| Have you felt guilty about the way you gamble or what happens when you gamble? | 9 | 0/42 (0.00%) | 2/39 (5.12%) | 0.23 |

**Table S2C.** Prevalence of impulse-control disorder behaviours (M-QUIP) at each follow-up in the active treatment and placebo groups. Values are presented as n/N (%). QUIP = Questionnaire for Impulsive–Compulsive Disorders in Parkinson’s Disease.

| **Activity** | **Week** | **Question stem** | **Active treatment,**  **n/N (%)** | **Placebo,**  **n/N (%)** | **p-value** |
| --- | --- | --- | --- | --- | --- |
| Buying | 3 | Strong urge | 8/43 (18.60%) | 3/42 (7.14%) | 0.19 |
| Eating | 3 | Strong urge | 8/43 (18.60%) | 9/42 (21.43%) | 0.96 |
| Gambling | 3 | Strong urge | 1/43 (2.33%) | 0/42 (0%) | 1.00 |
| Hobbyism | 3 | Strong urge | 12/43 (27.90%) | 14/42 (33.33%) | 0.76 |
| Punding | 3 | Strong urge | 6/43 (13.95%) | 11/42 (26.19%) | 0.25 |
| Sex | 3 | Strong urge | 6/43 (13.95%) | 3/42 (7.14%) | 0.48 |
| Buying | 3 | Difficulty controlling | 11/43 (25.58%) | 2/42 (4.76%) | **0.01** |
| Eating | 3 | Difficulty controlling | 9/43 (20.93%) | 7/42 (16.67%) | 0.82 |
| Gambling | 3 | Difficulty controlling | 0/43 (0.00%) | 0/42 (0.00%) | 1.00 |
| Hobbyism | 3 | Difficulty controlling | 7/43 (16.28%) | 5/42 (11.90%) | 0.79 |
| Punding | 3 | Difficulty controlling | 6/43 (13.95%) | 7/42 (16.67%) | 0.96 |
| Sex | 3 | Difficulty controlling | 1/43 (2.33%) | 1/42 (2.38%) | 1.00 |
| Buying | 6 | Strong urge | 6/43 (13.95%) | 1/42 (2.38%) | 0.11 |
| Eating | 6 | Strong urge | 8/43 (18.60%) | 8/42 (19.05%) | 1.00 |
| Gambling | 6 | Strong urge | 0/43 (0.00%) | 0/42 (0.00%) | 0.91 |
| Hobbyism | 6 | Strong urge | 7/43 (16.28%) | 7/42 (16.67%) | 1.00 |
| Punding | 6 | Strong urge | 3/43 (6.98%) | 11/42 (26.19%) | **0.02** |
| Sex | 6 | Strong urge | 6/43 (13.95%) | 5/42 (11.90%) | 1.00 |
| Buying | 6 | Difficulty controlling | 3/43 (6.98%) | 2/42 (4.76%) | 1.00 |
| Eating | 6 | Difficulty controlling | 6/43 (13.95%) | 8/42 (19.05%) | 0.69 |
| Gambling | 6 | Difficulty controlling | 0/43 (0.00%) | 0/42 (0.00%) | 0.91 |
| Hobbyism | 6 | Difficulty controlling | 4/43 (9.30%) | 6/42 (14.29%) | 0.51 |
| Punding | 6 | Difficulty controlling | 1/43 (2.33%) | 5/42 (11.90%) | 0.10 |
| Sex | 6 | Difficulty controlling | 1/43 (2.33%) | 1/42 (2.38%) | 1.00 |
| Buying | 9 | Strong urge | 4/43 (9.30%) | 4/42 (9.52%) | 1.00 |
| Eating | 9 | Strong urge | 4/43 (9.30%) | 7/42 (16.67%) | 0.34 |
| Gambling | 9 | Strong urge | 0/43 (0.00%) | 0/42 (0.00%) | 0.82 |
| Hobbyism | 9 | Strong urge | 9/42 (20.93%) | 7/42 (16.67%) | 0.91 |
| Punding | 9 | Strong urge | 6/43 (13.95%) | 6/42 (14.29%) | 1.00 |
| Sex | 9 | Strong urge | 3/43 (6.98%) | 7/42 (16.67%) | 0.18 |
| Buying | 9 | Difficulty controlling | 3/43 (6.98%) | 3/42 (7.14%) | 1.00 |
| Eating | 9 | Difficulty controlling | 3/43 (6.98%) | 8/42 (19.05%) | 0.11 |
| Gambling | 9 | Difficulty controlling | 0/43 (0.00%) | 0/42 (0.00%) | 0.82 |
| Hobbyism | 9 | Difficulty controlling | 6/43 (13.95%) | 4/42 (9.52%) | 0.74 |
| Punding | 9 | Difficulty controlling | 5/43 (11.63%) | 5/42 (11.90%) | 1.00 |
| Sex | 9 | Difficulty controlling | 1/43 (2.33%) | 2/42 (4.76%) | 0.61 |
