# Supplementary material for: Efficacy and target engagement of dopamine agonist pramipexole for anhedonic depression - the PRIME-PRAXOL randomized controlled trial
Source: Research Square preprint supplement (doi:10.21203/rs.3.rs-7887410/v1), 2025-10-29
Supplement: Supplementary file 6 [file ff44994ced98ec169aebfa15.docx]

**Supplementary Table 1.** Adverse events in the safety population, i.e. all patients that were randomized to either pramipexole or placebo (n=85). The adverse events were documented based on patient reports during conversations with study staff, while the symptoms listed in Supplementary Table 2 are based on self-ratings at each study visit. As a result, there might be discrepancies between the tables regarding impulse control-related symptoms.

| **Adverse event** | **Pramipexole**  **N= 43** | **Placebo**  **N = 42** |
| --- | --- | --- |
| Any adverse event | 43 | 40 |
| Any serious adverse event | 0 | 0 |
| **CNS** | | |
| Headache | 21 | 18 |
| Dizziness | 14 | 2 |
| Fatigue | 20 | 13 |
| Anxiety | 13 | 3 |
| Restlessness | 6 | 2 |
| Increased irritability | 4 | 4 |
| Sleep disturbances | 31 | 14 |
| Restless legs | 2 | 3 |
| Depressed mood | 1 | 5 |
| Cognitive symptoms | 2 | 2 |
| Tremor | 1 | 1 |
| Nightmares | 1 | 7 |
| Stress | 0 | 1 |
| Asthenia | 1 | 2 |
| Hallucinations | 0 | 1 |
| Migraine | 1 | 2 |
| Obsessions | 1 | 0 |
| Suicidal thoughts | 0 | 1 |
| Derealization | 3 | 1 |
| Hypomanic symptoms | 2 | 0 |
| Mood swings | 1 | 0 |
| Balance disturbance | 1 | 0 |
| Enhanced sense of taste and hearing | 1 | 0 |
| Increased alcohol consumption | 1 | 0 |
| Increased nicotine cravings | 0 | 1 |
| Increased thoughts about sex/buying | 1(sex) | 1(buying) |
| **Gastrointestinal/metabolic/nutritional** | | |
| Nausea | 26 | 6 |
| Loss of appetite | 9 | 2 |
| Increased appetite | 2 | 3 |
| Weight loss | 3 | 0 |
| Weight gain | 1 | 0 |
| Obstipation | 9 | 3 |
| Gastritis | 4 | 4 |
| Excessive gas or flatulence | 1 | 0 |
| Diarrhea | 3 | 2 |
| Gastroenteritis | 1 | 1 |
| Abdominal pain | 5 | 0 |
| Vomiting | 2 | 0 |
| **Infection/inflammation** | | |
| Rhinopharyngitis | 7 | 7 |
| Pharyngitis | 2 | 1 |
| Gingivitis | 0 | 1 |
| Influenza | 0 | 2 |
| Fever | 2 | 1 |
| Pneumonia | 1 | 0 |
| Bronchitis | 1 | 0 |
| UTI | 2 | 0 |
| Covid 19 | 1 | 1 |
| Seasonal allergy | 1 | 1 |
| **Otorhinolaryngology** | | |
| Blocked ears | 1 | 1 |
| Dysphagia | 1 | 0 |
| Sinus pain | 1 | 0 |
| Rhinorrhoea | 1 | 1 |
| Dry mouth | 2 | 0 |
| Tinnitus | 0 | 2 |
| Cough | 0 | 2 |
| Hoarseness | 1 | 0 |
| **Ophthalmology** | | |
| Blurry vision | 1 | 2 |
| Dilated pupils | 1 | 0 |
| **Musculoskeletal system** |  |  |
| Arthralgia | 1 | 2 |
| Muscle tension | 1 | 3 |
| Back pain | 1 | 2 |
| Muscle weakness | 1 | 1 |
| Whiplash | 1 | 0 |
| **Circulation/hematology/respiratory** | | |
| Hypotension | 1 | 0 |
| Hematoma | 0 | 1 |
| Flashes | 2 | 3 |
| Thrombosis | 0 | 1 |
| Dyspnoea | 0 | 2 |
| **Urogenital** | | |
| Ejaculation problem | 1 | 0 |
| Urgency | 1 | 0 |
| Pruritus | 1 | 0 |
| **Lab** | | |
| Blood samples out of range liver | 0 | 1 |
| Blood samples out of range kidney | 0 | 1 |
| **Dermatology** | | |
| Urticaria | 1 | 0 |
| Allergic reaction | 1 | 0 |
| Pruritus | 1 | 0 |
| Acne | 1 | 0 |
